# Supplementary material for: Amylase catalyzed synthesis of glycosyl acrylates and their polymerization
Source: Royal Society of Chemistry journal article supplement (doi:10.1039/c3gc41471j), 2013-09-26

## Electronic Supplementary Information

# Amylase Catalyzed Synthesis of Glycosyl- Acrylates and their polymerization

*Wouter M. J. Kloosterman, Danijela Jovanovic, Sander G. M. Brouwer, Katja Loos\**

Department of Polymer Chemistry, University of Groningen, Nijenborgh 4,  
9747 AG Groningen, the Netherlands

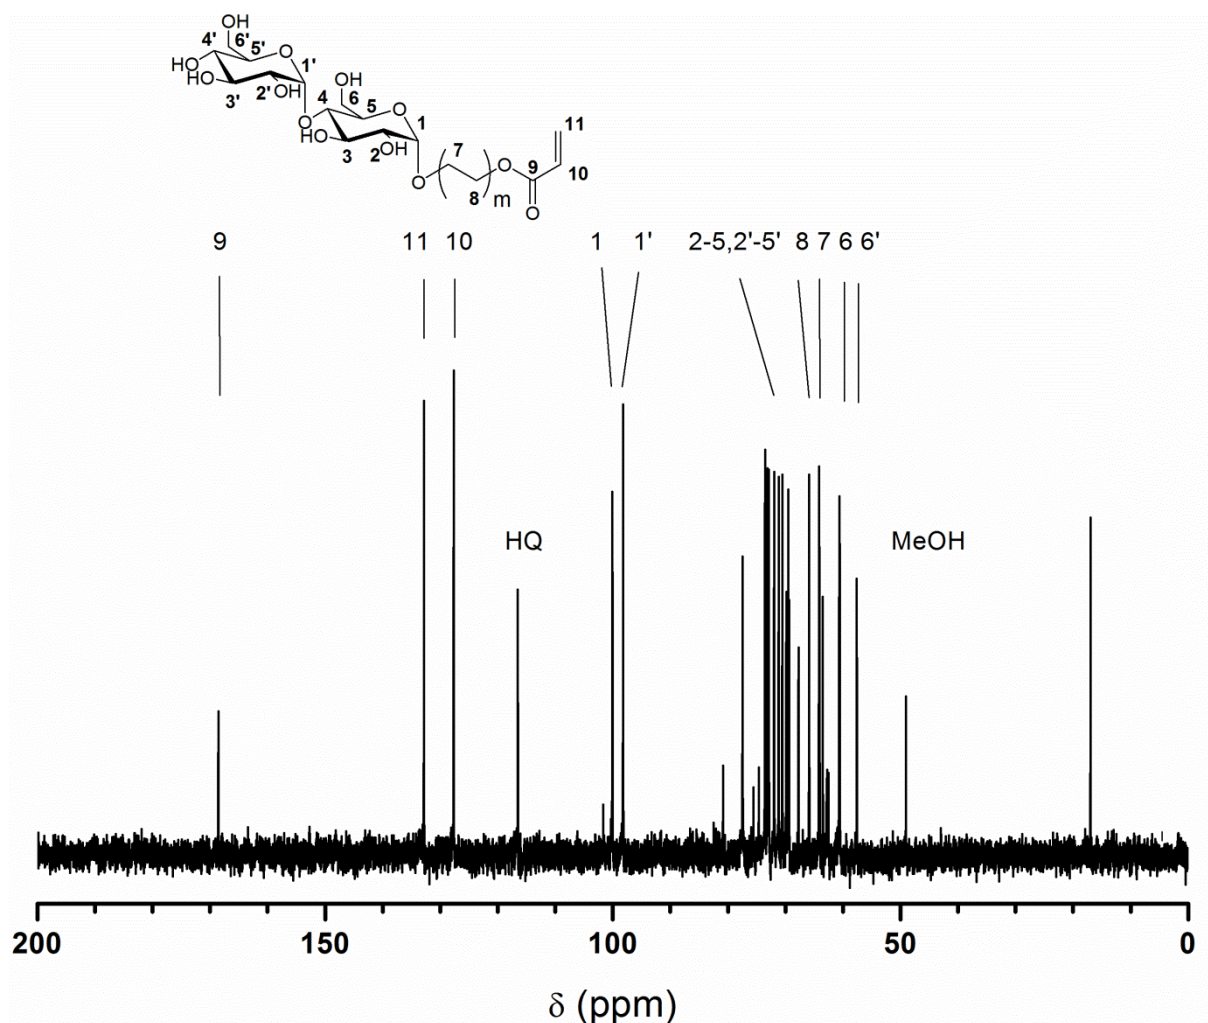

Figure S1.  $^{13}\text{C}$ -NMR of Glc-Glc-EA

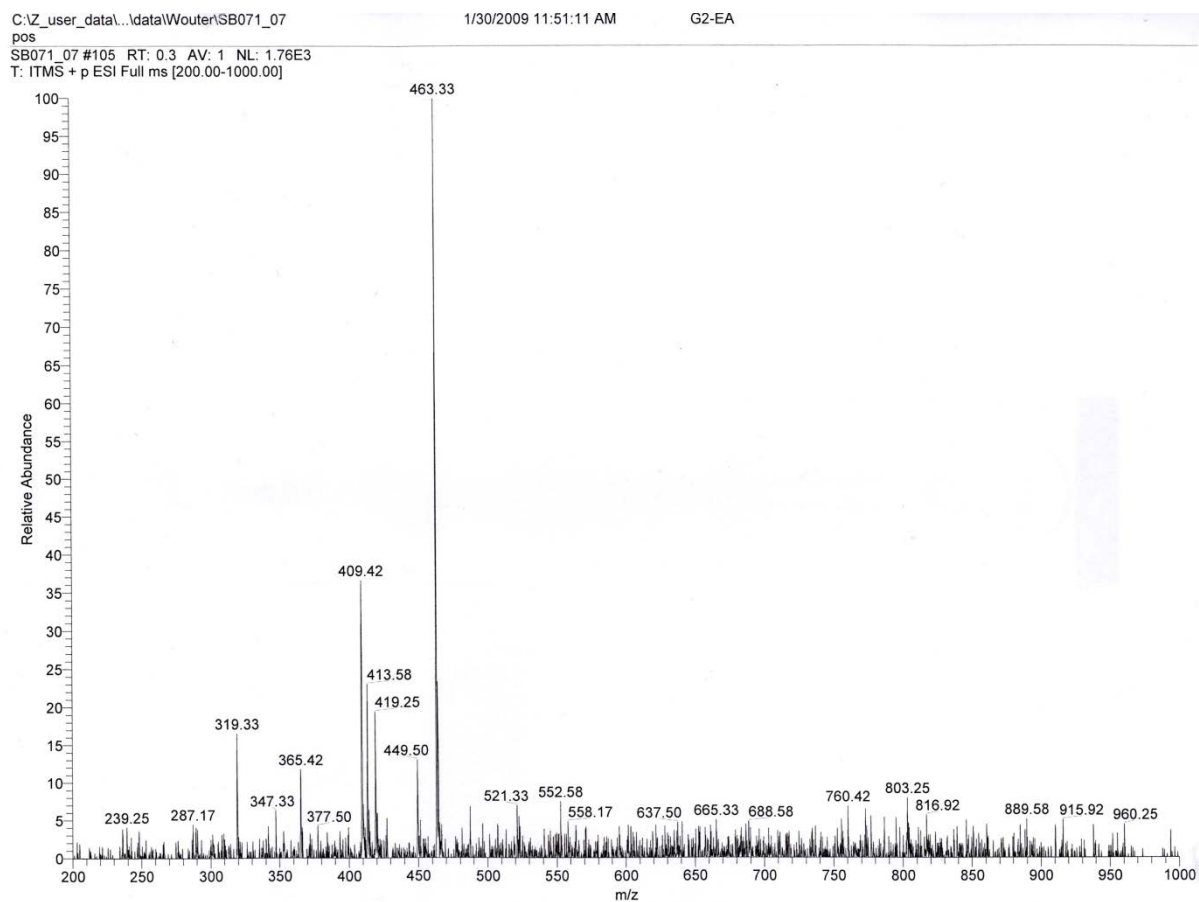

Figure S2. Positive ion ESI-MS spectrum of Glc-Glc-EA

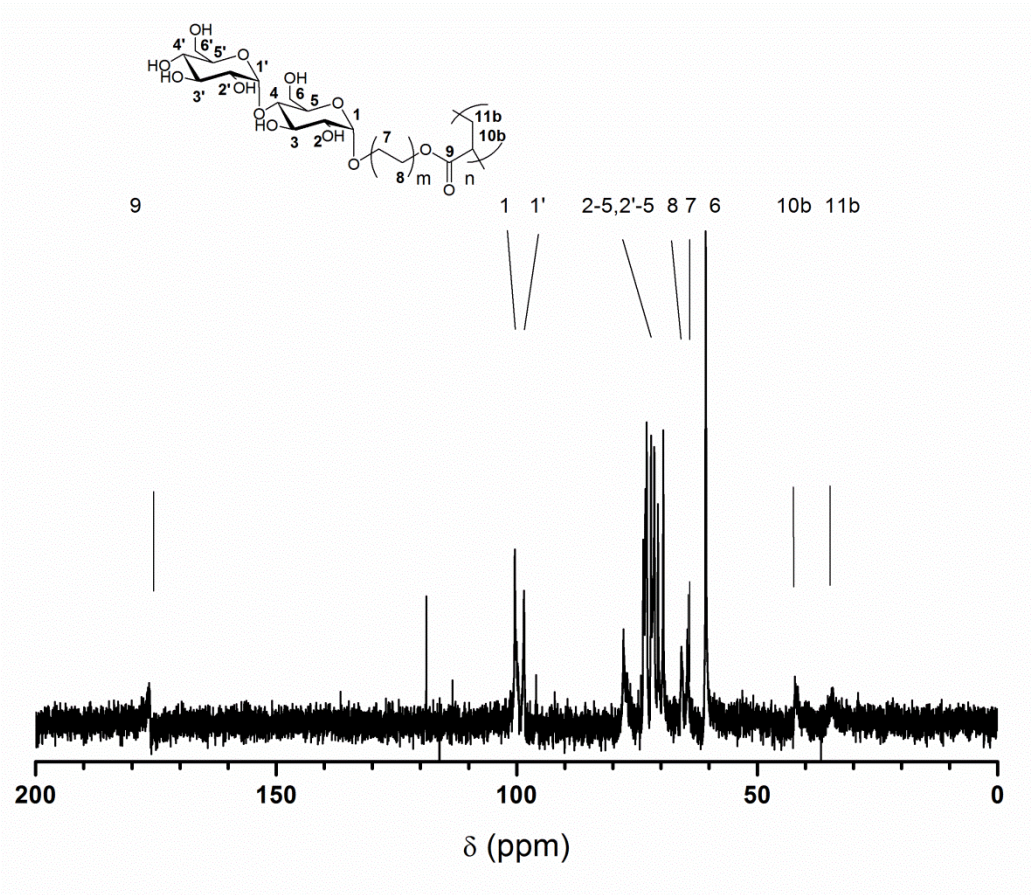

Figure S3.  $^{13}\text{C}$ -NMR of Poly(Glc-Glc-EA)

Figure S4 Hydrolytic activity of tested amylases as determined by the DNSS method.

### Saccharification amylases

1 U = amount of enzyme that liberates 1  $\mu\text{mol}$  maltose per minute at pH 6.0, 25  $^{\circ}\text{C}$  using starch as the substrate

| Entry | Tradel name      | Enzyme type        | Enzyme origin               | Hydrolytic activity (U/ $\mu\text{L}$ ) |
|-------|------------------|--------------------|-----------------------------|-----------------------------------------|
| 1     | A8220            | $\alpha$ -amylase  | <i>Aspergillus oryzae</i>   | 16                                      |
| 2     | A7595            | $\alpha$ -amylase  | <i>B. amyloliquefaciens</i> | 9                                       |
| 3     | Biokleitase L500 | $\alpha$ -amylase  | <i>B. amyloliquefaciens</i> | 22                                      |
| 4     | Optimalt BBA     | $\beta$ -amylase   | from barley                 | 7                                       |
| 5     | A7130            | $\beta$ -amylase   | from barley                 | 26                                      |
| 6     | Spezyme DBA      | $\beta$ -amylase   | from barley                 | 12                                      |
| 7     | NS22035          | Amyloglucosidase   |                             | 7                                       |
| 8     | Spirizyme        | Amyloglucosidase   |                             | 9                                       |
| 9     | Gammadex         | Amyloglucosidase   | <i>A. niger</i>             | 4                                       |
| 10    | Dextrozyme       | Amyloglucosidase   | <i>A. niger</i>             | 7                                       |
| 11    | A7095            | Amyloglucosidase   | <i>A. niger</i>             | 12                                      |
| 12    | Novamyl L        | Maltogenic amylase | <i>B. stearotheophilus</i>  | 2                                       |
| 13    | Veron Xtender    | Maltogenic amylase | <i>B. stearotheophilus</i>  | 31 <sup>a</sup>                         |

<sup>a</sup> Activity in U/mg

### Liquefaction amylases

1 U = amount of enzyme that liberates 1  $\mu\text{mol}$  maltose per minute at pH 6.0, 25  $^{\circ}\text{C}$  using starch as the substrate

| Entry | Commercial name          | Enzyme origin                  | Hydrolytic activity (U/ $\mu\text{L}$ ) |
|-------|--------------------------|--------------------------------|-----------------------------------------|
| 1     | Clarase L                | <i>Aspergillus oryzae</i>      | 120                                     |
| 2     | Neomalz H <sub>2</sub> O | <i>Bacillus subtilis</i>       | 21                                      |
| 3     | Kleitase T10S            | <i>Bacillus subtilis</i>       | 14                                      |
| 4     | Liquozyme Supra          | Thermostable $\alpha$ -amylase | 9                                       |
| 5     | Gamalpha P120L           | Thermostable $\alpha$ -amylase | 10                                      |
| 6     | Gamalpha Spezial         | Thermostable $\alpha$ -amylase | 12                                      |
| 7     | Spezyme FRED             | <i>Bacillus licheniformis</i>  | 10                                      |
| 8     | Spezyme AA               | <i>Bacillus licheniformis</i>  | 16                                      |
| 9     | Spezyme Alpha            | <i>Bacillus licheniformis</i>  | 11                                      |
| 10    | Clearflow AA             | <i>Bacillus licheniformis</i>  | 12                                      |

Figure S5 Remaining activity of the tested amylases after incubation in 30 v% 2-HEA solution at 60 °C for 15 minutes.

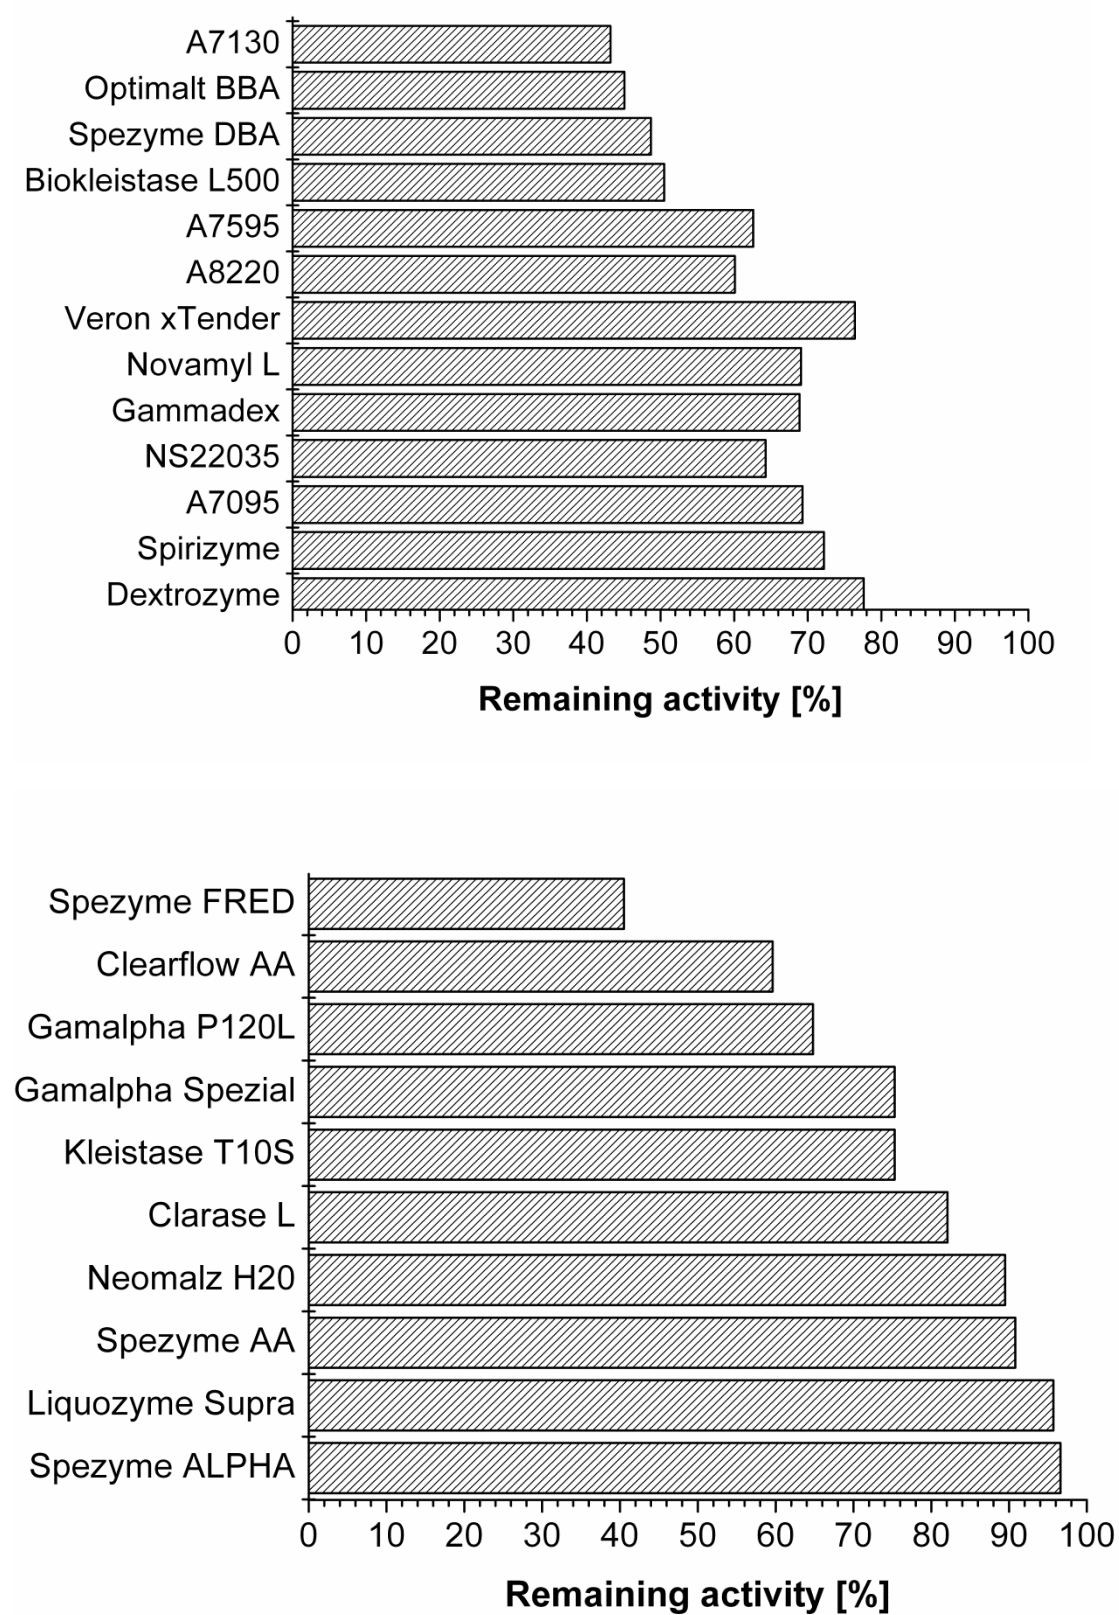

Supplement: c3gc41471j.pdf [file c3gc41471j.pdf]
